# Supplementary material for: Associating Attitudes towards AI and Ambiguity: The Distinction of Acceptance and Fear of AI
Source: Research Square preprint supplement (doi:10.21203/rs.3.rs-6007527/v1), 2025-02-27
Supplement: Supplementary file 1 [file 0ec2e74cd61f7d01a562bfbb.docx]

## **Supplementary Result: Multiple Regression Analyses**

Multiple regression analyses further clarified the relationships between attitudes toward ambiguity and AI attitudes, with AI acceptance and fear being mutually controlled. For AI acceptance (*R²* = .10, *F*(4, 549) = 15.34, *p* < .001), Need for Complexity and Novelty (*β* = 0.11, *p* = .044) and Absolutism (*β* = 0.21, *p* = .003) emerged as significant positive predictors, while AI fear showed a negative effect (*β* = -0.25, *p* < .001). For AI fear (*R²* = .13, *F*(4, 549) = 20.44, *p* < .001), both Discomfort with Ambiguity (*β* = 0.23, *p* = .003) and Absolutism (*β* = 0.32, *p* < .001) were significant positive predictors, while AI acceptance showed a negative effect (*β* = -0.34, *p* < .001). These results showed the same patterns of significance as the structural equation modeling reported in the main text.

## **Supplementary Table 1**

*Statistical details of the SEM results*

| Latent Variables: | Estimate | SE | z value | p value |
| --- | --- | --- | --- | --- |
| AI fear =~ |  |  |  |  |
| atai_1 | 2.03 | .10 | 20.69 | .00 |
| atai_3 | 1.64 | .09 | 18.45 | .00 |
| atai_5 | .97 | .09 | 11.11 | .00 |
| AI acceptance =~ |  |  |  |  |
| atai_2 | 1.55 | .12 | 13.45 | .00 |
| atai_4 | .98 | .09 | 10.99 | .00 |
| Discomfort with Ambiguity =~ |  |  |  |  |
| maas_3 | .97 | .06 | 16.68 | .00 |
| maas_5 | .85 | .05 | 16.37 | .00 |
| maas_8 | .77 | .05 | 16.21 | .00 |
| maas_10 | .95 | .05 | 17.76 | .00 |
| maas_12 | .96 | .06 | 17.06 | .00 |
| maas_16 | .81 | .05 | 15.56 | .00 |
| maas_20 | .70 | .06 | 11.34 | .00 |
| Absolutism =~ |  |  |  |  |
| maas_1 | 1.03 | .05 | 19.03 | .00 |
| maas_4 | .87 | .06 | 14.48 | .00 |
| maas_6 | .99 | .06 | 16.01 | .00 |
| maas_9 | .92 | .05 | 17.23 | .00 |
| maas_14 | .30 | .05 | 6.16 | .00 |
| maas_18 | .74 | .05 | 13.90 | .00 |
| maas_21 | .44 | .05 | 8.65 | .00 |
| Need for Complexity and Novelty =~ |  |  |  |  |
| maas_2 | 1.16 | .05 | 22.17 | .00 |
| maas_7 | .82 | .05 | 16.23 | .00 |
| maas_11 | .58 | .05 | 10.57 | .00 |
| maas_13 | .79 | .05 | 15.04 | .00 |
| maas_15 | 1.10 | .05 | 22.66 | .00 |
| maas_17 | 1.20 | .05 | 24.03 | .00 |
| maas_19 | 1.24 | .05 | 25.49 | .00 |
| AI fear =~ |  |  |  |  |
| Discomfort with Ambiguity | .21 | .06 | 3.70 | .00 |
| Absolutism | .32 | .06 | 5.12 | .00 |
| Need for Complexity and Novelty | .01 | .05 | .08 | .93 |
| AI acceptance =~ |  |  |  |  |
| Discomfort with Ambiguity | .05 | .06 | .85 | .40 |
| Absolutism | .31 | .07 | 4.73 | .00 |
| Need for Complexity and Novelty | .14 | .06 | 2.59 | .01 |
|  |  |  |  |  |
| Covariances: | Estimate | SE | z value | p value |
| Discomfort with Ambiguity ~~ |  |  |  |  |
| Absolutism | .34 | .05 | 7.10 | .00 |
| Absolutism ~~ |  |  |  |  |
| Need for Complexity and Novelty | -.01 | .05 | -.13 | .90 |
| Discomfort with Ambiguity ~~ |  |  |  |  |
| Need for Complexity and Novelty | -.15 | .05 | -3.22 | .00 |
| AI fear ~~ |  |  |  |  |
| AI acceptance | -.38 | .05 | -7.66 | .00 |
|  |  |  |  |  |
| Variances: | Estimate | SE | z value | p value |
| .atai_1 | 1.28 | .26 | 4.98 | .00 |
| .atai_3 | 1.71 | .19 | 8.97 | .00 |
| .atai_5 | 3.05 | .20 | 15.60 | .00 |
| .atai_2 | .52 | .31 | 1.67 | .10 |
| .atai_4 | 1.68 | .16 | 10.42 | .00 |
| .maas_3 | 1.17 | .08 | 14.07 | .00 |
| .maas_5 | .95 | .07 | 14.20 | .00 |
| .maas_8 | .80 | .06 | 14.27 | .00 |
| .maas_10 | .93 | .07 | 13.53 | .00 |
| .maas_12 | 1.07 | .08 | 13.89 | .00 |
| .maas_16 | .99 | .07 | 14.52 | .00 |
| .maas_20 | 1.62 | .10 | 15.68 | .00 |
| .maas_1 | .81 | .07 | 11.57 | .00 |
| .maas_4 | 1.38 | .10 | 14.55 | .00 |
| .maas_6 | 1.37 | .10 | 13.84 | .00 |
| .maas_9 | .92 | .07 | 13.09 | .00 |
| .maas_14 | 1.20 | .07 | 16.35 | .00 |
| .maas_18 | 1.11 | .08 | 14.77 | .00 |
| .maas_21 | 1.21 | .08 | 16.04 | .00 |
| .maas_2 | .76 | .05 | 13.89 | .00 |
| .maas_7 | 1.01 | .06 | 15.61 | .00 |
| .maas_11 | 1.38 | .09 | 16.28 | .00 |
| .maas_13 | 1.11 | .07 | 15.80 | .00 |
| .maas_15 | .63 | .05 | 13.64 | .00 |
| .maas_17 | .58 | .05 | 12.77 | .00 |
| .maas_19 | .47 | .04 | 11.47 | .00 |
| AI fear | 1.00 |  |  |  |
| AI acceptance | 1.00 |  |  |  |
| Discomfort with Ambiguity | 1.00 |  |  |  |
| Absolutism | 1.00 |  |  |  |
| Need for Complexity and Novelty | 1.00 |  |  |  |
